# Supplementary material for: Core/shell structured halloysite/polyaniline nanotubes with enhanced electrochromic properties
Source: Royal Society of Chemistry journal article supplement (doi:10.1039/c8tc01163j), 2018-01-01
Supplement: c8tc01163j2.pdf [file c8tc01163j2.pdf]

## Supporting Information

### Core/Shell Structure Halloysite/Polyaniline Nanotubes with Enhanced Electrochromic Properties

Fei Hu, Jianlong Xu, Sihang Zhang, Jie Jiang, Bin Yan, Yingchun Gu, Mengjin Jiang, Shaojian Lin and Sheng Chen\*

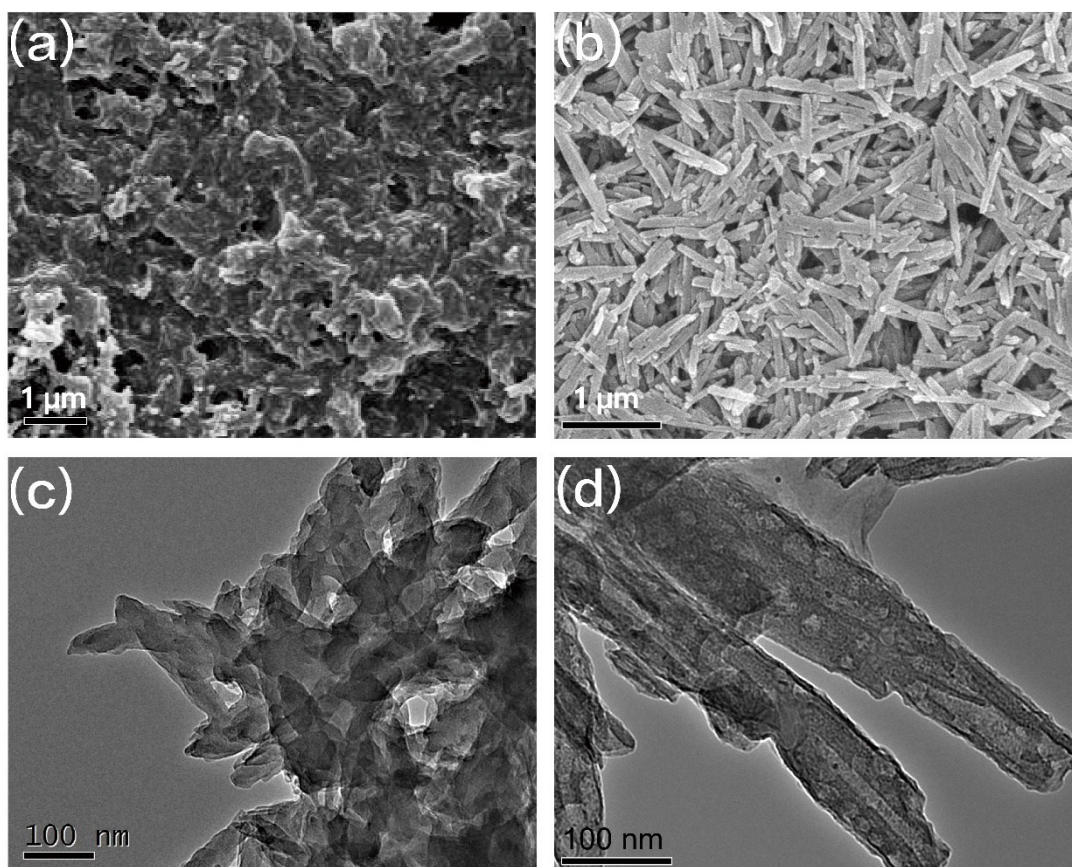

**Figure S1.** SEM images of (a) PANI and (b) 25PANI/75HNT; TEM images of (c) PANI and (d) 25PANI/75HNT.

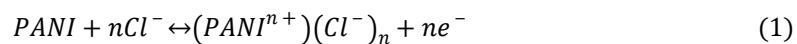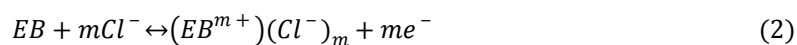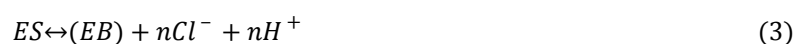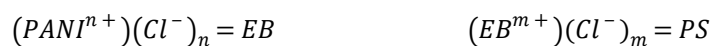

**Figure S2.** The reactions in the oxidation-reduction process.

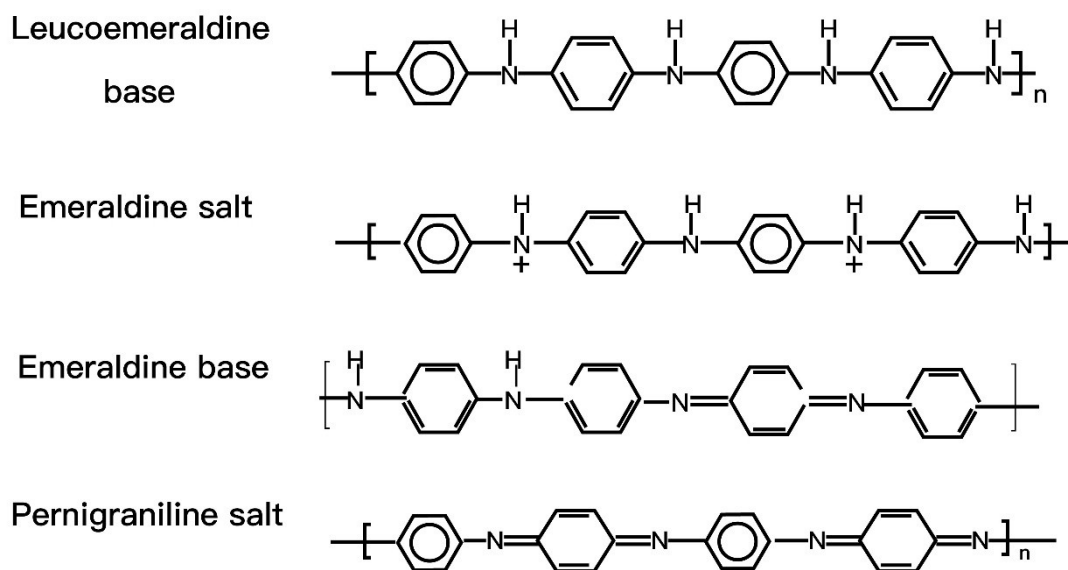

**Figure S3.** Main molecular structures of LB, ES, EB and PS.

**Table S1.** Current and Potential from **Figure 4.**

| samples      | A <sub>1</sub>                |               | A <sub>2</sub>                |               | C <sub>1</sub>                |               | C <sub>2</sub>                |               |
|--------------|-------------------------------|---------------|-------------------------------|---------------|-------------------------------|---------------|-------------------------------|---------------|
|              | Current (mA/cm <sup>2</sup> ) | Potential (V) |
| Pure PANI    | 0.009                         | 0.511         | 0.010                         | 0.951         | -0.009                        | -0.230        | -0.011                        | 0.185         |
| 75PANI/25HNT | 0.012                         | 0.464         | 0.008                         | 0.862         | -0.008                        | -0.116        | -0.013                        | 0.269         |
| 50PANI/50HNT | 0.006                         | 0.329         | 0.003                         | 0.710         | -0.003                        | -0.044        | -0.008                        | 0.396         |
| 25PANI/75HNT | 0.005                         | 0.367         | 0.003                         | 0.735         | -0.003                        | -0.044        | -0.007                        | 0.341         |

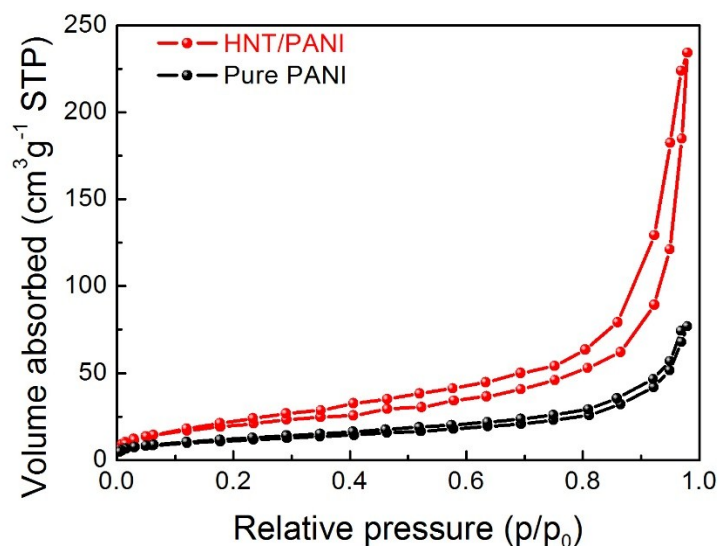

**Figure S4.** Nitrogen adsorption (solid symbol)/desorption (hollow symbol) isotherms.

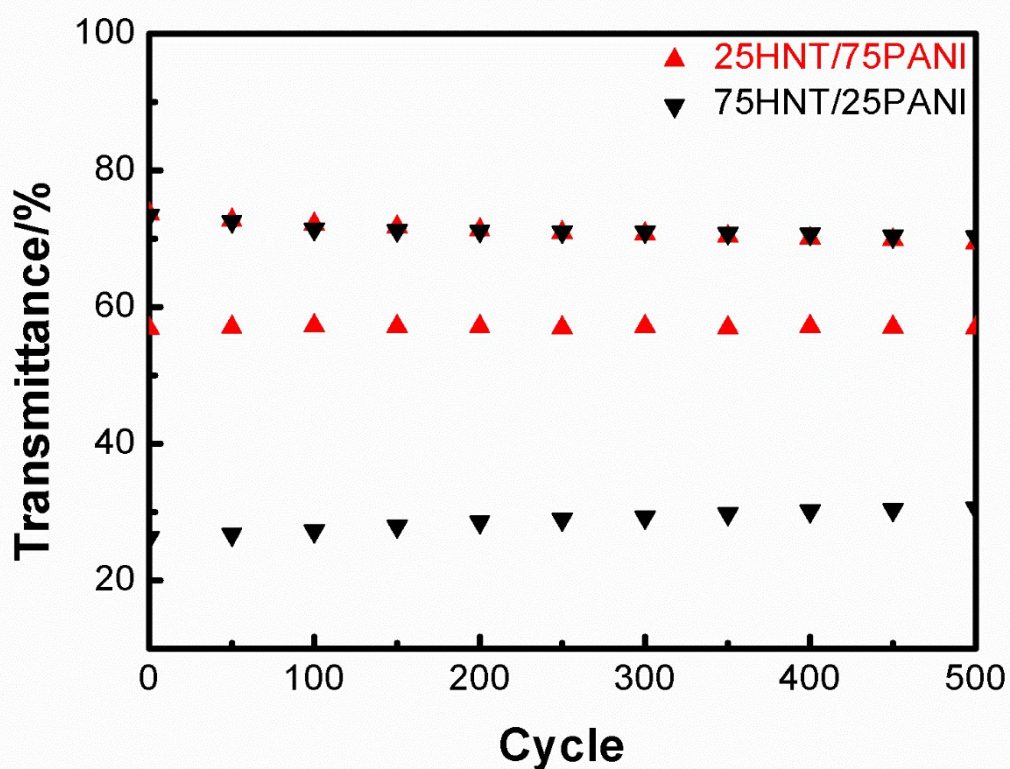

**Figure S5.** The cycling stability test of the 25HNT/75PANI and 75HNT/25PANI.

**Table S2.** The charge values and current density of each materials

| Samples      | Charge values (C/cm <sup>2</sup> ) | Current density (mA/cm <sup>2</sup> ) |
|--------------|------------------------------------|---------------------------------------|
| PANI         | 0.08576                            | 0.009                                 |
| 25HNT/75PANI | 0.15105                            | 0.012                                 |
| 50HNT/50PANI | 0.06447                            | 0.006                                 |
| 75HNT/25PANI | 0.06358                            | 0.005                                 |
